# Supplementary material for: Preparation of 4-dicyanomethylene-2,6-distyryl-4H-pyran derivatives, their functional polystyrenes and study of their different aggregation induced emission behaviors
Source: Royal Society of Chemistry journal article supplement (doi:10.1039/c3tc32244k), 2013-12-16
Supplement: c3tc32244k.pdf [file c3tc32244k.pdf]

## **Preparation of 4-dicyanomethylene-2,6-distyryl-4H-pyran derivatives, their functional polystyrenes and study of their different aggregation induced emission behaviors**

**You-Hao Zhang, Pei-Yang Gu, Jie-Bo Zhou, Yu-Jie Xu, Wu Liu, Qian-Feng Gu,  
Dong-Yun Chen, Na-Jun Li, Qing-Feng Xu,\* and Jian-Mei Lu\***

Synthesis of 2,6-(dimethyl-4H-pyran-4-ylidene)malononitrile

2,6-Dimethyl- $\gamma$ -pyrone (100 mmol, 12.41 g) and malononitrile (150 mmol, 9.91 g) were dissolved in 50 mL of acetic anhydride at 130 °C and stirred for 2 h under reflux. After cooling, the reaction mixture was poured into 1000 mL ice water. The precipitate was filtered and recrystallized twice from ethanol. Yield: 84% (84.3 mmol, 14.52 g).  $^1\text{H NMR}$  (400 MHz,  $\text{CDCl}_3$ )  $\delta$  (ppm) 6.55 (s, 2H), 2.32 (s, 6H).

Synthesis of 4-[(2-hydroxy-ethyl)-methyl-amino]-benzaldehyde

2-(methylamino)ethanol (510 mmol, 38.31 g), 4-fluorobenzaldehyde (150 mmol, 18.62 g), potassium carbonate (430 mmol, 59.42 g), phase transfer catalyst 18-crown-6 (0.38 mmol, 100 mg) and 60 mL of dimethyl sulfoxide (DMSO) were refluxed in a two-necked round-bottomed flask under the protection of nitrogen at 100 °C for 5 days. The reaction mixture was cooled, poured into cold water, and extracted with chloroform. The organic layer was washed with water and dried over anhydrous magnesium sulfate. The solvent was removed under reduced pressure and the residue was further purified by silica gel chromatography using petroleum/ethyl acetate mixture (2:1 by volume) as eluent. Yield: 71% (71.1 mmol, 19.10 g).  $^1\text{H NMR}$  (400 MHz,  $\text{DMSO}-d_6$ )  $\delta$  (ppm) 9.65 (s, 1H), 7.68 (d,  $J = 8.8 \text{ Hz}$ , 2H), 6.82 (d,  $J = 8.8 \text{ Hz}$ , 2H), 4.80 (t,  $J = 5.2 \text{ Hz}$ , 1H), 3.60 (m, 2H), 3.53 (dt,  $J = 4.8 \text{ Hz}$ ,  $J = 5.6 \text{ Hz}$ , 2H), 3.05 (s, 3H).

Synthesis of 4-(2-hydroxyethoxy)benzaldehyde

To a solution of 4-hydroxybenzaldehyde (200 mmol, 24.40 g) and ethylene chlorohydrin (200 mmol, 16.00 g) in 60 mL of DMSO was added potassium carbonate (400 mmol, 55.20 g). The reaction mixture was stirred for 6 h at 100 °C and then poured into cold water and extracted with chloroform. The organic layer was washed with water and dried over anhydrous magnesium sulfate. Evaporation of the solvent afforded a residue, which was purified by silica gel chromatography using petroleum/ethyl acetate mixture (3:2 by volume) as eluent. Yield: 82% (164 mmol, 27.22 g).  $^1\text{H NMR}$  (400 MHz,  $\text{CDCl}_3$ )  $\delta$  (ppm) 9.90 (s, 1H), 7.85 (d,  $J = 9.3 \text{ Hz}$ , 2H), 7.03 (d,  $J = 8.7 \text{ Hz}$ , 2H), 4.18 (t,  $J = 9.0 \text{ Hz}$ , 2H), 4.02 (q,  $J = 9.3 \text{ Hz}$ , 2H).

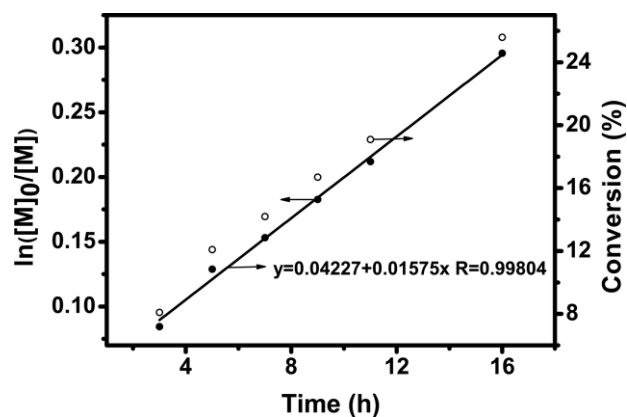

**Fig. S1-1** The kinetic plot for the ATRP of St initiated by EtAmPy in cyclohexanone solution ( $[\text{initiator}]_0:[\text{CuBr}]_0:[\text{PMDETA}]_0:[\text{styrene}]_0 = 1:3:6:500$ ,  $[\text{styrene}]_0 = 10.0 \text{ mol L}^{-1}$ ).

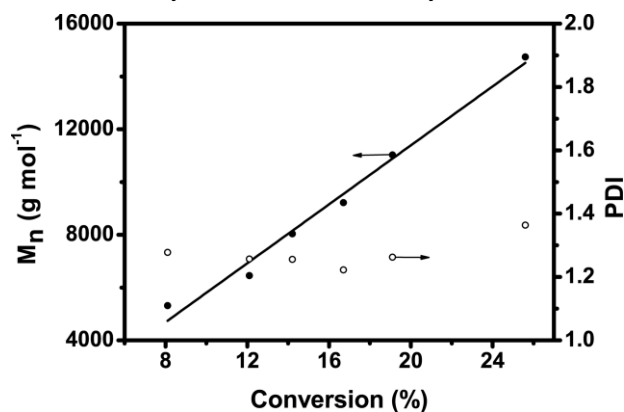

**Fig. S1-2** Dependence of  $M_n$  and PDI with conversion for the polymerization of styrene initiated by EtAmPy in cyclohexanone solution ( $[\text{initiator}]_0:[\text{CuBr}]_0:[\text{PMDETA}]_0:[\text{styrene}]_0 = 1:3:6:500$ ,  $[\text{styrene}]_0 = 10.0 \text{ mol L}^{-1}$ ).

**TABLE S1** Initiators, Reaction time, Molecular weight and Monomer conversions of the Polymers made by ATRP

| Initiator | Time(h) | Conversion (%) | $M_{n,\text{GPC}}$ | PDI ( $M_w/M_n$ ) |
|-----------|---------|----------------|--------------------|-------------------|
| EtAmPy    | 3       | 8.1            | 5320               | 1.27              |
|           | 5       | 12.1           | 6460               | 1.25              |
|           | 7       | 14.2           | 8040               | 1.25              |
|           | 9       | 16.7           | 9220               | 1.22              |
|           | 11      | 19.1           | 11030              | 1.26              |
|           | 16      | 25.6           | 14740              | 1.36              |
| EtOxPy    | 5       | 11.8           | 6390               | 1.35              |

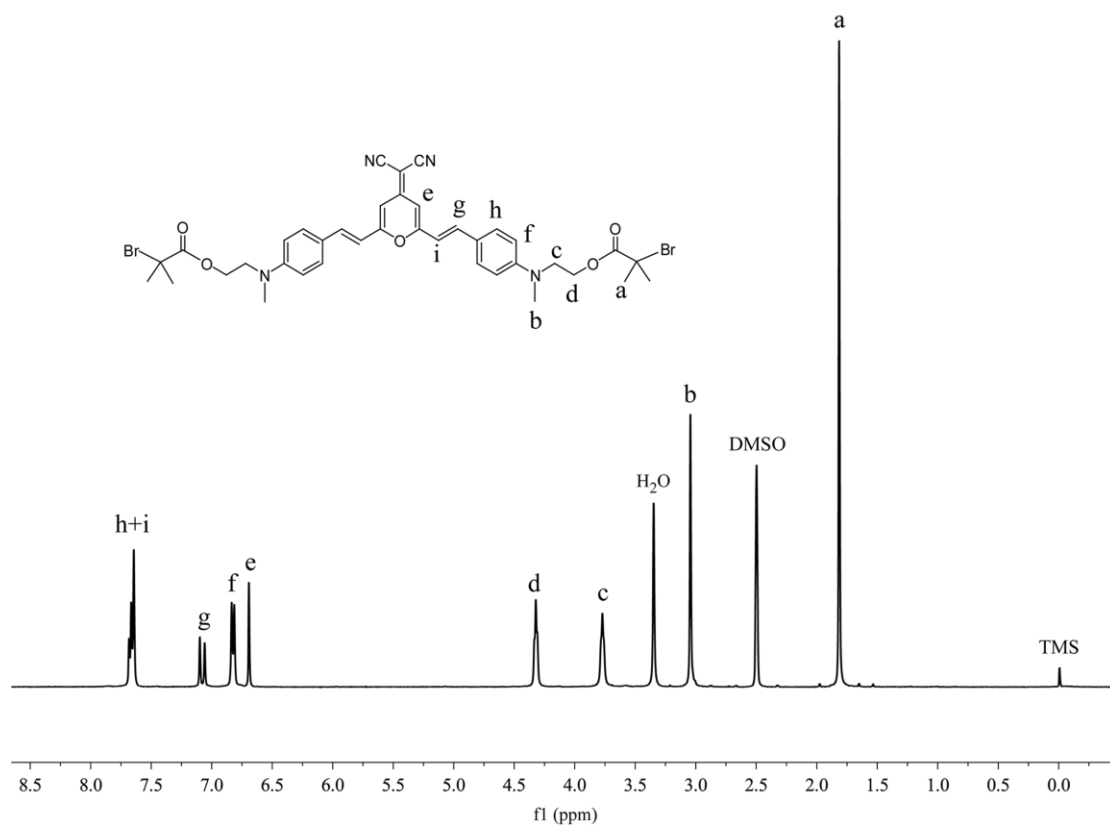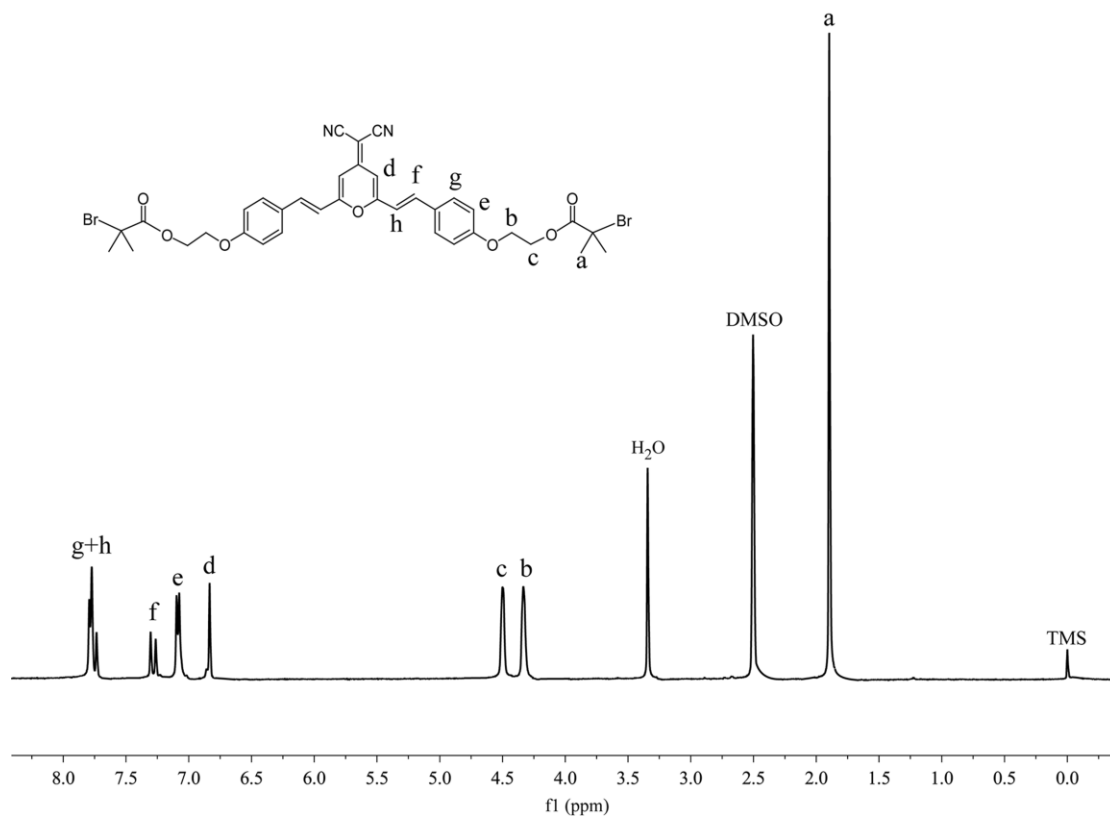

**Fig. S2-1** <sup>1</sup>H NMR spectra of EtAmPy (top) and EtOxPy (bottom) at room temperature (400 MHz, DMSO-*d*<sub>6</sub>).

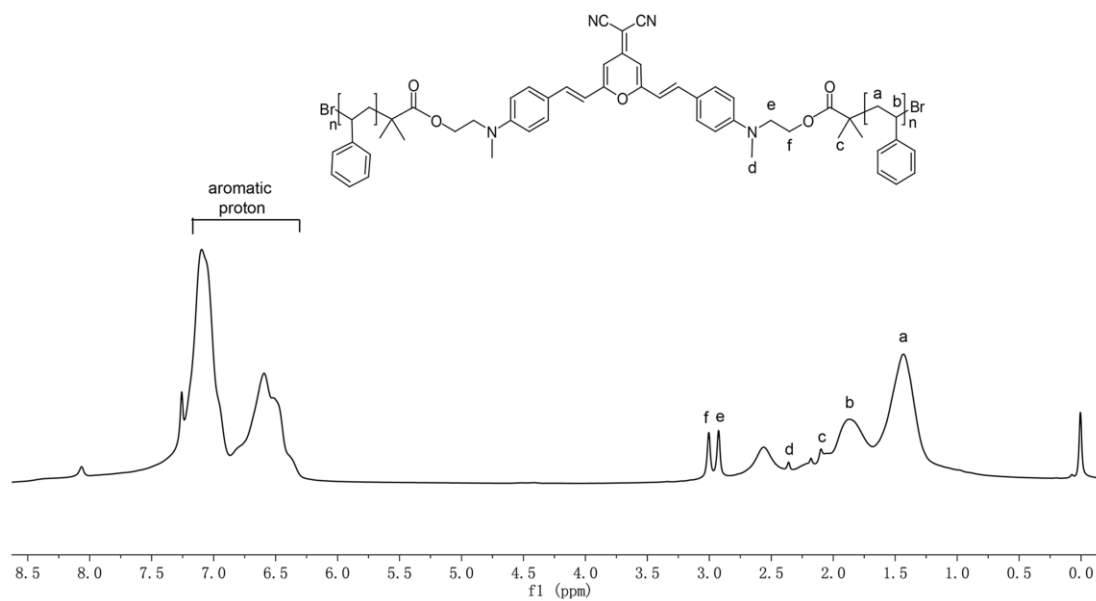

**Fig. S2-2**  $^1\text{H}$  NMR spectra of PSa at room temperature (400 MHz,  $\text{CDCl}_3$ ).

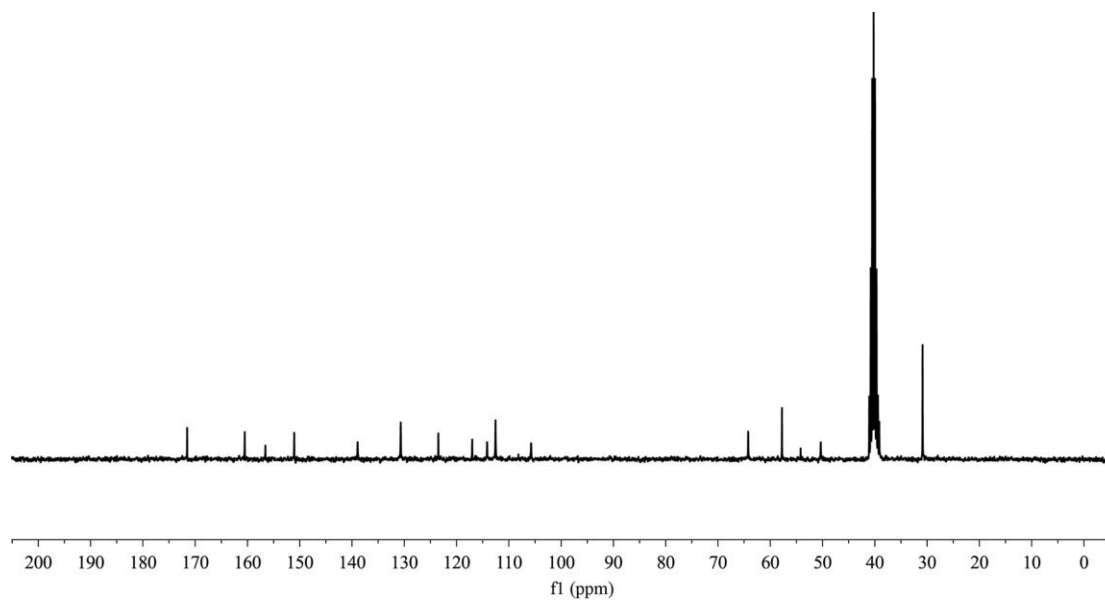

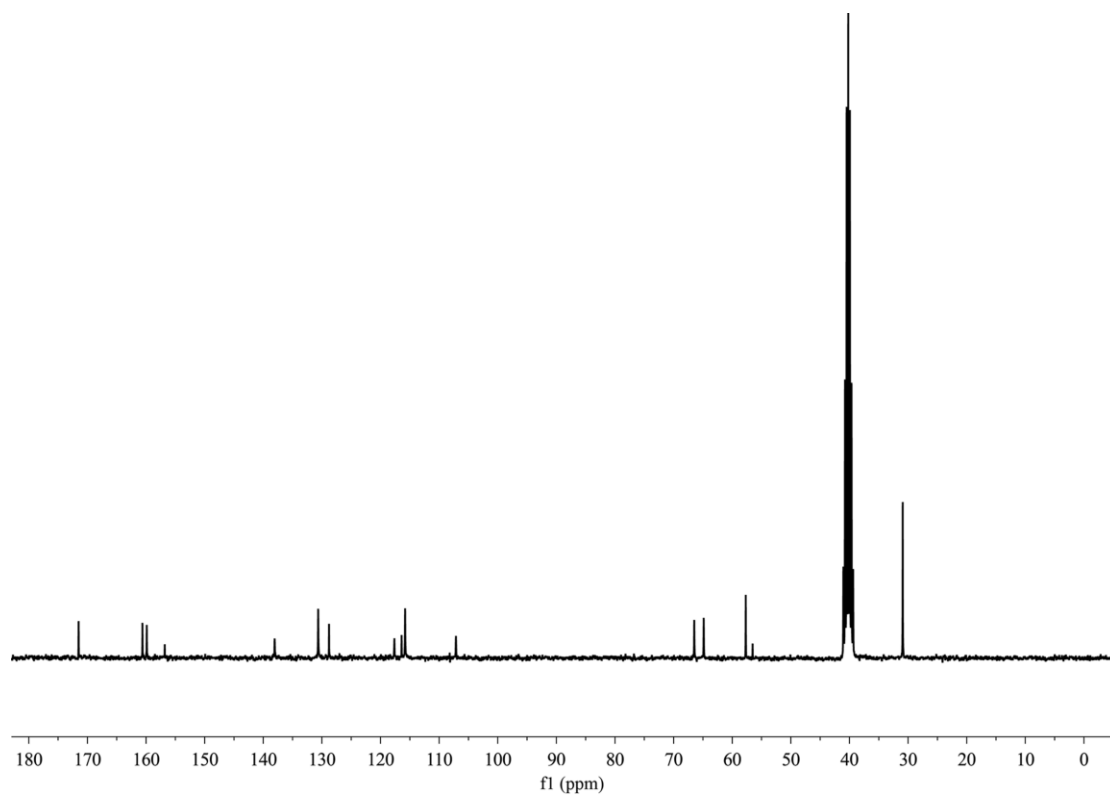

**Fig. S3**  $^{13}\text{C}$  NMR spectra of EtAmPy (top) and EtOxPy (bottom) at room temperature (300 MHz,  $\text{DMSO-}d_6$ ).

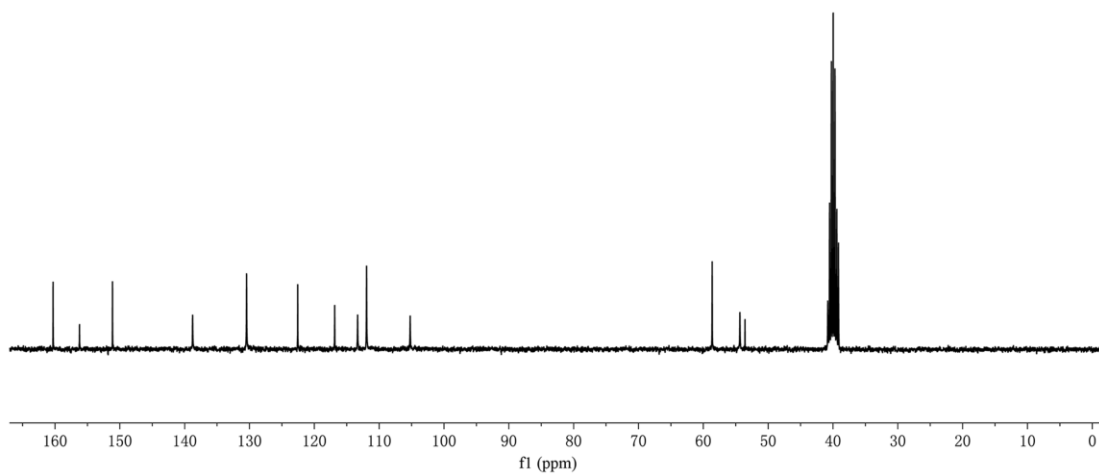

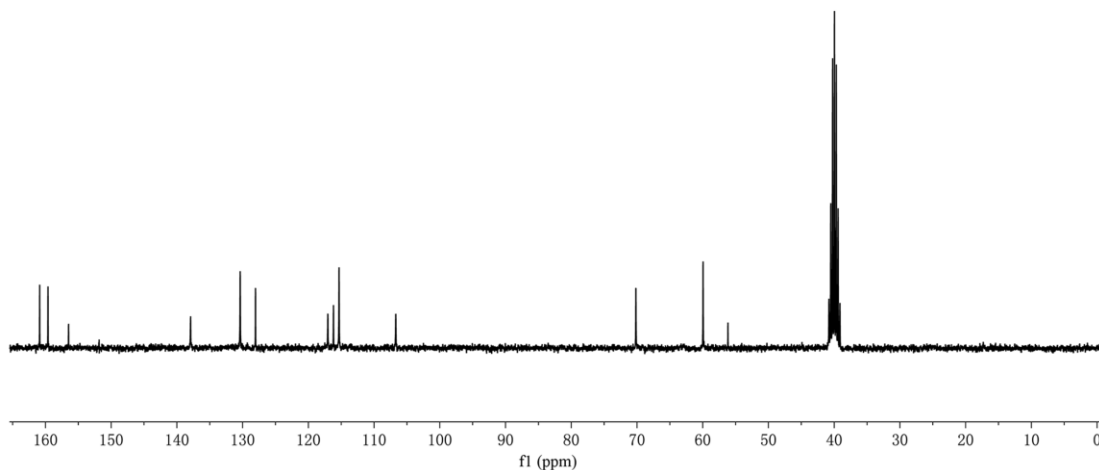

**Fig. S4**  $^{13}\text{C}$  NMR spectra of Compound 1 (top) and Compound 2 (bottom) at room temperature (300 MHz,  $\text{DMSO-}d_6$ ).

|               |            |             |       |                 |              |                        |                       |
|---------------|------------|-------------|-------|-----------------|--------------|------------------------|-----------------------|
| Sample Name   | YFJ-1      | Position    | Val 1 | Instrument Name | Instrument 1 | User Name              |                       |
| Inj Vol       | 0          | InjPosition |       | SampleType      | Sample       | IRM Calibration Status | Success               |
| Data Filename | YFJ-1-01.d | ACQ Method  |       | Comment         |              | Acquired Time          | 4/20/2013 11:43:01 AM |

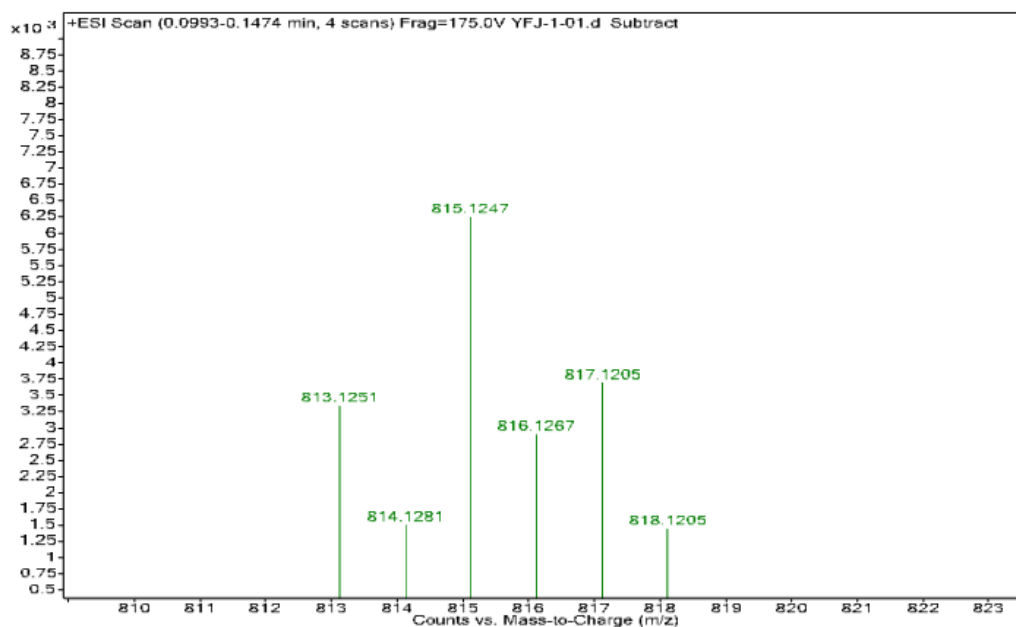

#### Formula Calculator

| Formula (M)                                                                   | Score | Mass     | Calc m/z | Diff (ppm) | DBE | Ion Formula                                                                     | m/z      |
|-------------------------------------------------------------------------------|-------|----------|----------|------------|-----|---------------------------------------------------------------------------------|----------|
| C <sub>38</sub> H <sub>40</sub> Br <sub>2</sub> N <sub>4</sub> O <sub>5</sub> | 99.49 | 790.1359 | 813.1258 | 0.84       | 20  | C <sub>38</sub> H <sub>40</sub> Br <sub>2</sub> N <sub>4</sub> NaO <sub>5</sub> | 813.1251 |

**Fig. S5** LC-MS of EtAmPy

|               |            |             |        |                 |              |                        |                      |
|---------------|------------|-------------|--------|-----------------|--------------|------------------------|----------------------|
| Sample Name   | yfj-2      | Position    | Vial 1 | Instrument Name | Instrument 1 | User Name              |                      |
| Inj Vol       | 0          | InjPosition |        | SampleType      | Sample       | IRM Calibration Status | Success              |
| Data Filename | yfj-2-01.d | ACQ Method  |        | Comment         |              | Acquired Time          | 4/23/2013 9:48:56 AM |

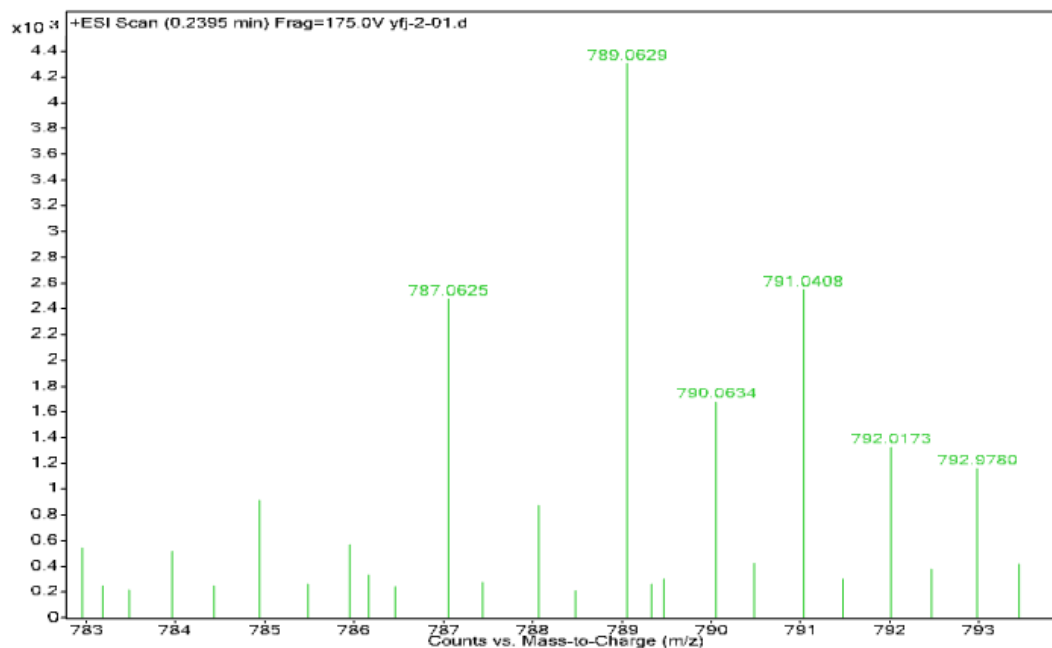

Formula Calculator

| Formula (M)       | Score | Mass     | Calc m/z | Diff (ppm) | DBE | Ion Formula          | m/z      |
|-------------------|-------|----------|----------|------------|-----|----------------------|----------|
| C36 H34 Br2 N2 O7 | 100   | 764.0733 | 787.0625 | 0          | 20  | C36 H34 Br2 N2 Na O7 | 787.0625 |

**Fig. S6** LC-MS of EtOxPy

|               |          |             |        |                 |              |                        |                       |
|---------------|----------|-------------|--------|-----------------|--------------|------------------------|-----------------------|
| Sample Name   | Z-4      | Position    | Vial 1 | Instrument Name | Instrument 1 | User Name              |                       |
| Inj Vol       | 0        | InjPosition |        | SampleType      | Sample       | IRM Calibration Status | Success               |
| Data Filename | Z-4-02.d | ACQ Method  |        | Comment         |              | Acquired Time          | 11/28/2012 3:16:16 PM |

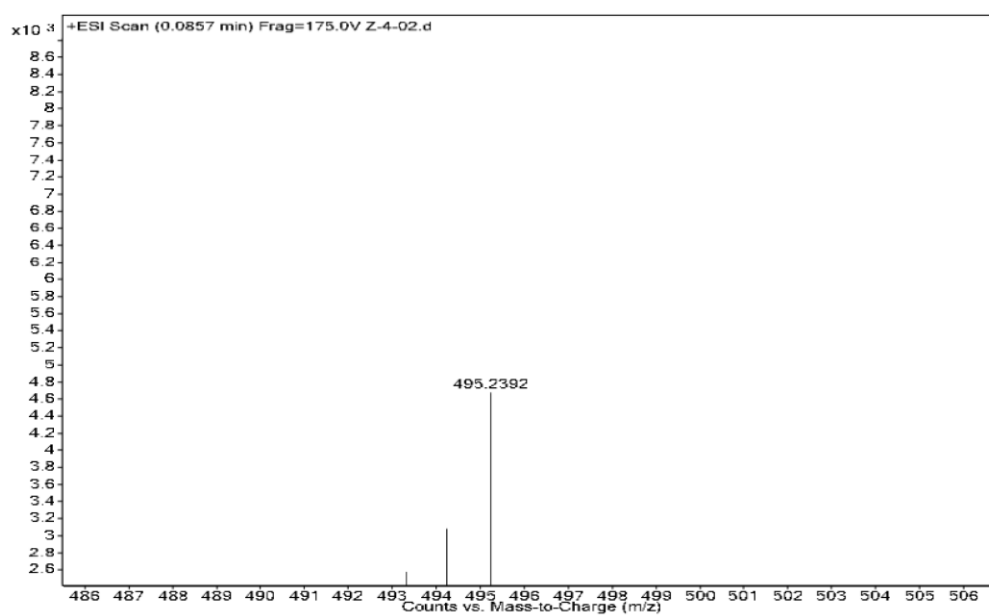

### Formula Calculator

| Formula (M)                                                   | Score | Mass     | Calc m/z | Diff (ppm) | DBE | Ion Formula                                                   | m/z      |
|---------------------------------------------------------------|-------|----------|----------|------------|-----|---------------------------------------------------------------|----------|
| C <sub>30</sub> H <sub>30</sub> N <sub>4</sub> O <sub>3</sub> | 99.96 | 494.2319 | 495.2391 | -0.27      | 18  | C <sub>30</sub> H <sub>31</sub> N <sub>4</sub> O <sub>3</sub> | 495.2392 |

Fig. S7 LC-MS of Compound 1

|               |           |             |        |                 |              |                        |                      |
|---------------|-----------|-------------|--------|-----------------|--------------|------------------------|----------------------|
| Sample Name   | zyh-b     | Position    | Vial 1 | Instrument Name | Instrument 1 | User Name              |                      |
| Inj Vol       | 0         | InjPosition |        | SampleType      | Sample       | IRM Calibration Status | Success              |
| Data Filename | zyh-b-1.d | ACQ Method  |        | Comment         |              | Acquired Time          | 7/22/2013 3:10:56 PM |

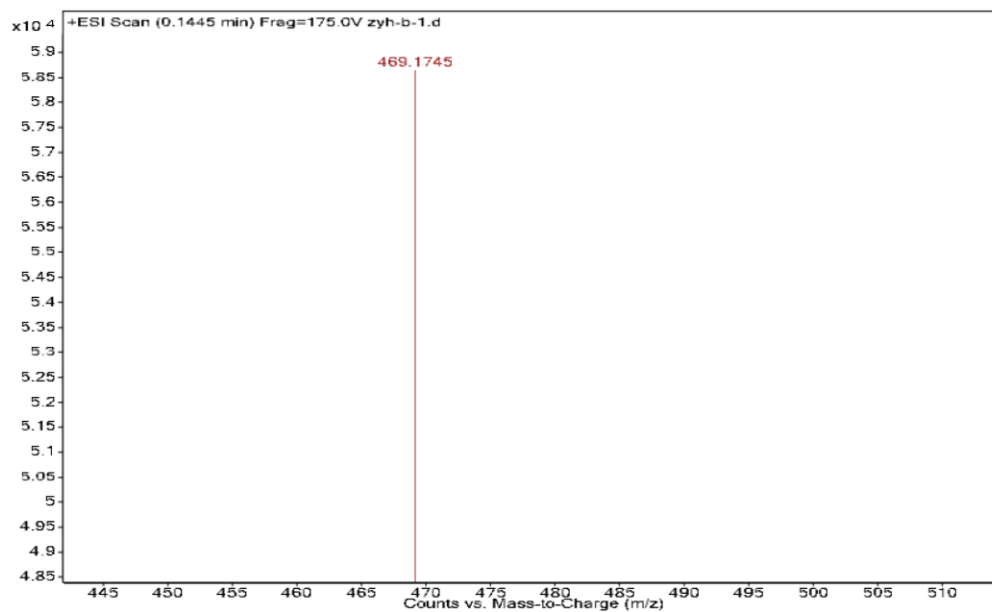

### Formula Calculator

| Formula (M)                                                   | Score | Mass     | Calc m/z | Diff (ppm) | DBE | Ion Formula                                                   | m/z      |
|---------------------------------------------------------------|-------|----------|----------|------------|-----|---------------------------------------------------------------|----------|
| C <sub>28</sub> H <sub>24</sub> N <sub>2</sub> O <sub>5</sub> | 96.39 | 468.1672 | 469.1758 | 2.77       | 18  | C <sub>28</sub> H <sub>25</sub> N <sub>2</sub> O <sub>5</sub> | 469.1745 |

Fig. S8 LC-MS of Compound 2

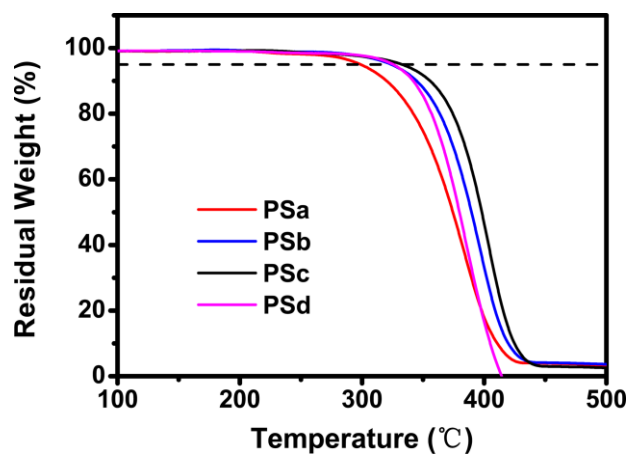



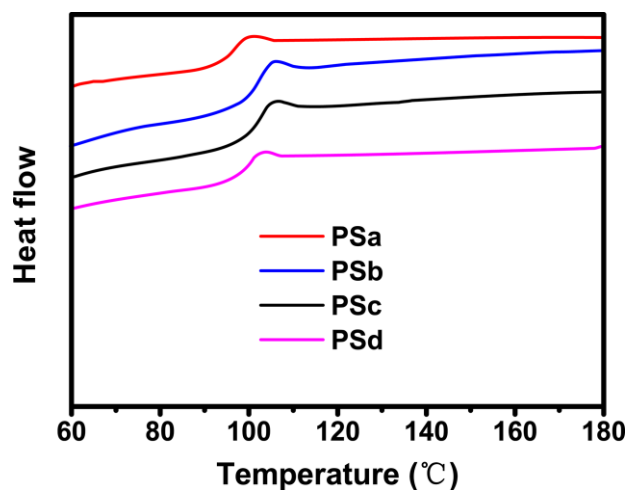

**Fig. S9** TGA (top) and DSC (bottom) thermograms of polymers, recorded under N<sub>2</sub> at a heating rate of 10 and 20 °C/min, respectively.

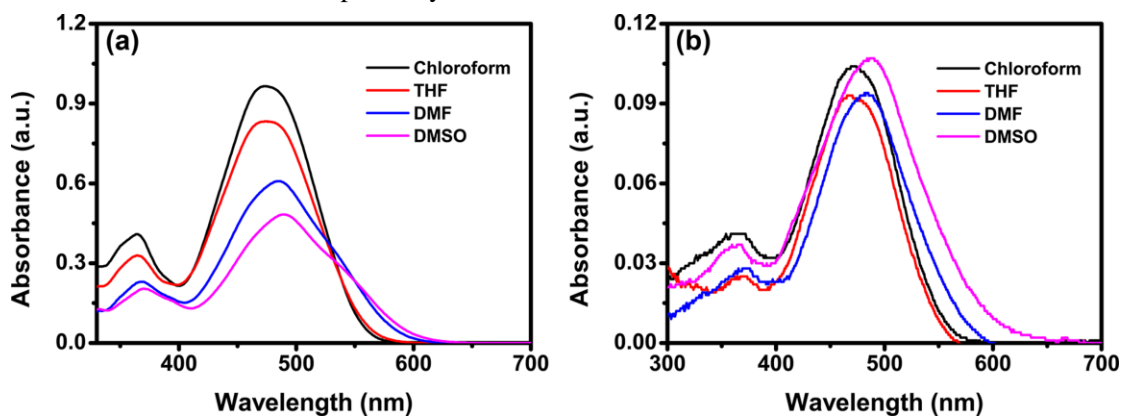

**Fig. S10** Absorption spectra of (a) EtAmPy and (b) PSa in different polar solvents. Concentration: 10 μM.

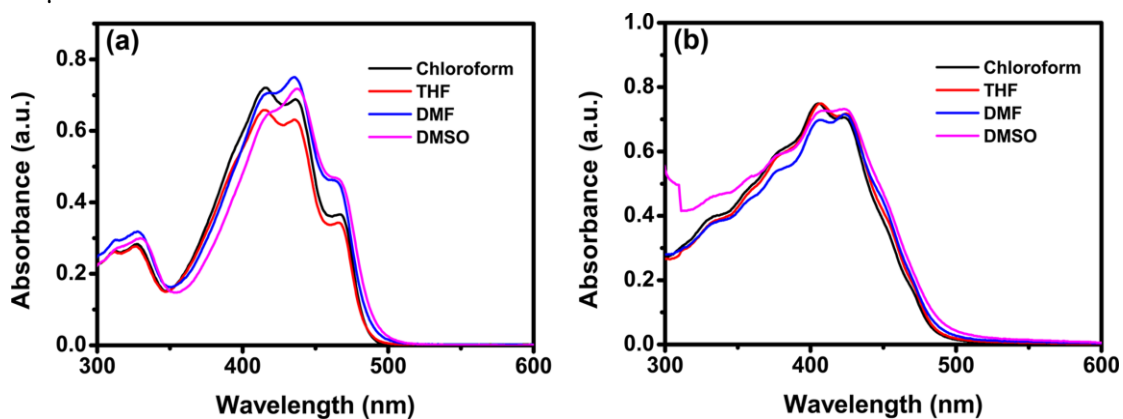

**Fig. S11** Absorption spectra of (a) EtOxPy and (b) PSd in different polar solvents. Concentration: 10 μM.

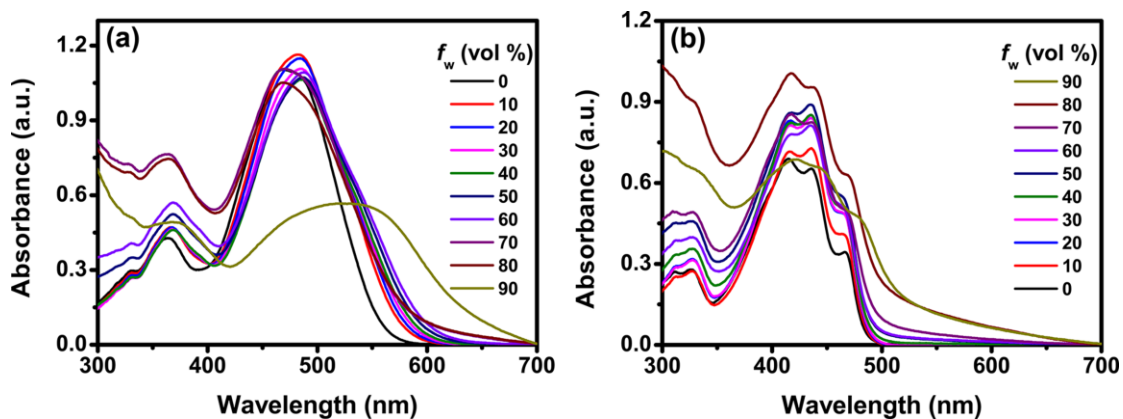

**Fig. S12** Absorption spectra of (a) EtAmPy and (b) EtOxPy in the THF/water mixtures. Concentration: 10  $\mu$ M.

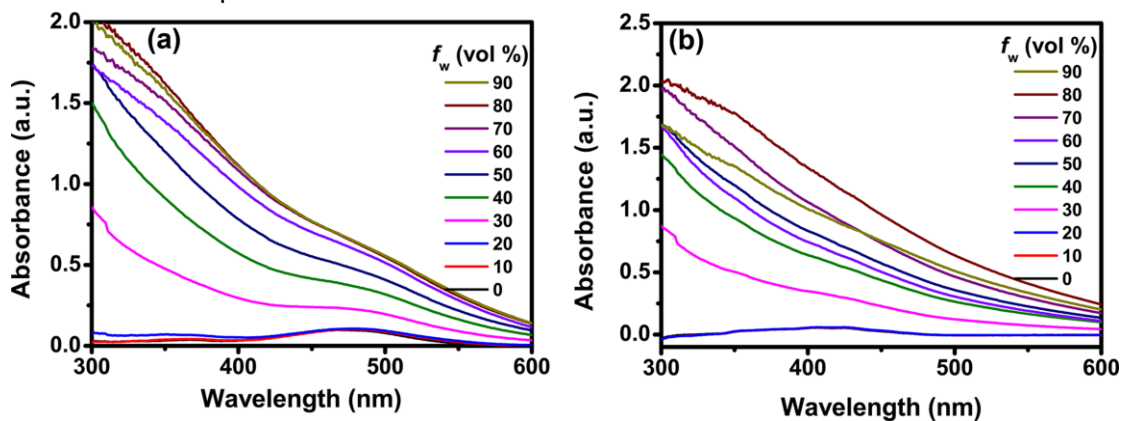

**Fig. S13** Absorption spectra of (a) Psa and (b) PSd in the THF/water mixtures. Concentration: 10  $\mu$ M

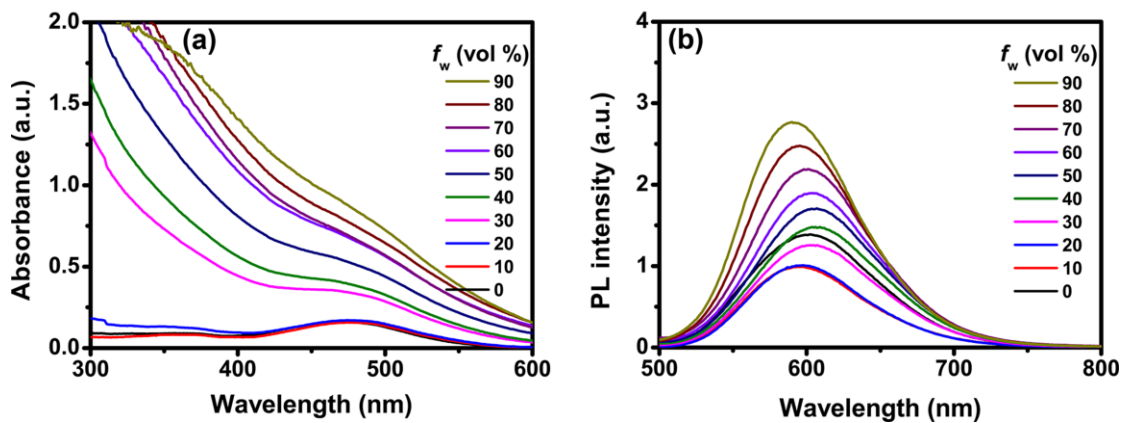

**Fig. S14** (a) Absorption and (b) emission spectra of PSb in THF/water mixtures. Concentration: 10  $\mu$ M. Excitation wavelength: 479 nm.

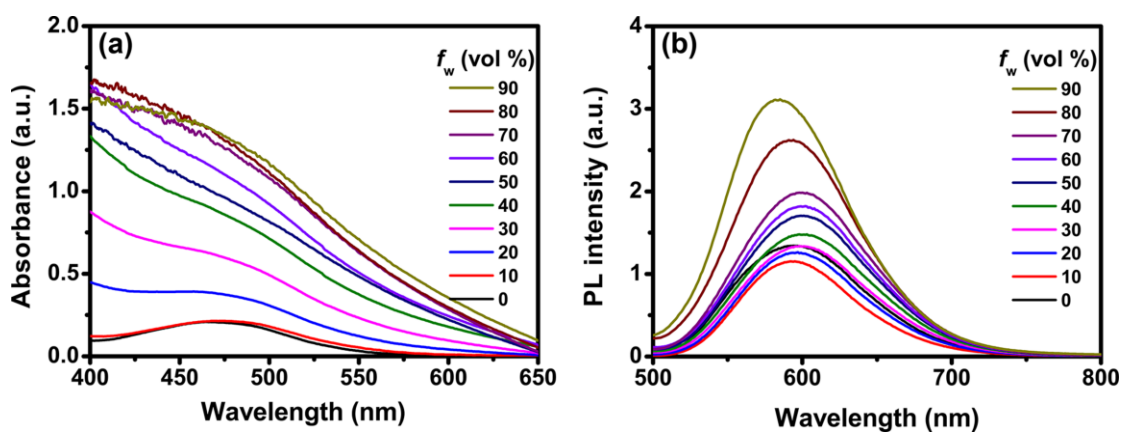

**Fig. S15** (a) Absorption and (b) emission spectra of PSc in THF/water mixtures. Concentration: 10  $\mu\text{M}$ . Excitation wavelength: 479 nm.

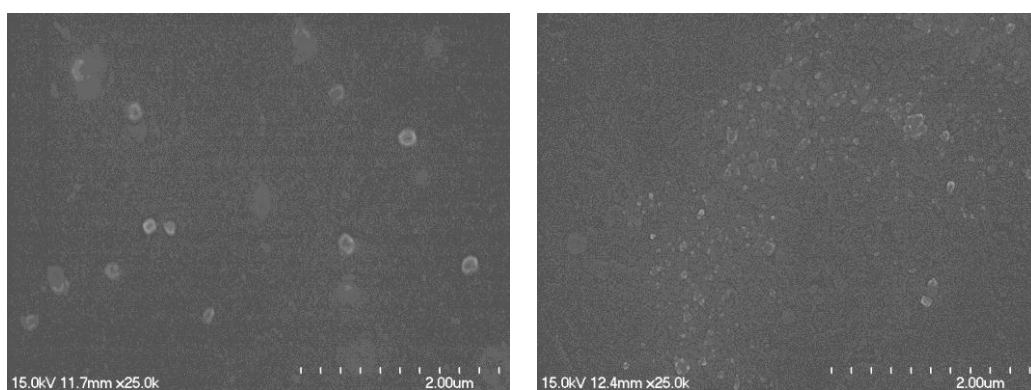

**Fig. S16** SEM images of EtAmPy formed in THF/water (4:6 (left) and 1:9 (right) by volume). Scale bar is 2  $\mu\text{m}$ .

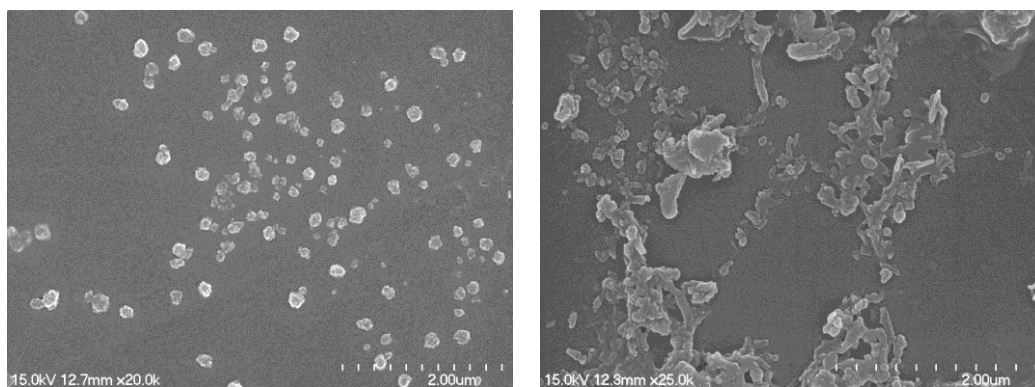

**Fig. S17** SEM images of EtOxPy formed in THF/water (4:6 (left) and 1:9 (right) by volume). Scale bar is 2  $\mu\text{m}$ .

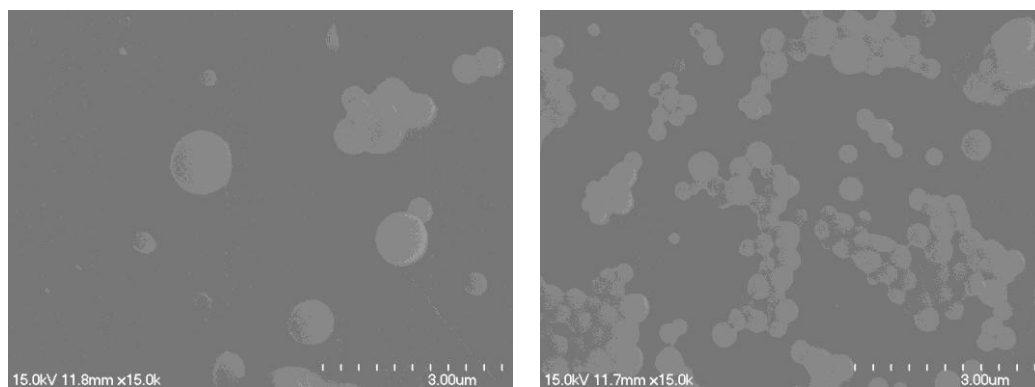

**Fig. S18** SEM images of PSa formed in THF/water (4:6 (left) and 1:9 (right) by volume). Scale bar is 3 μm.

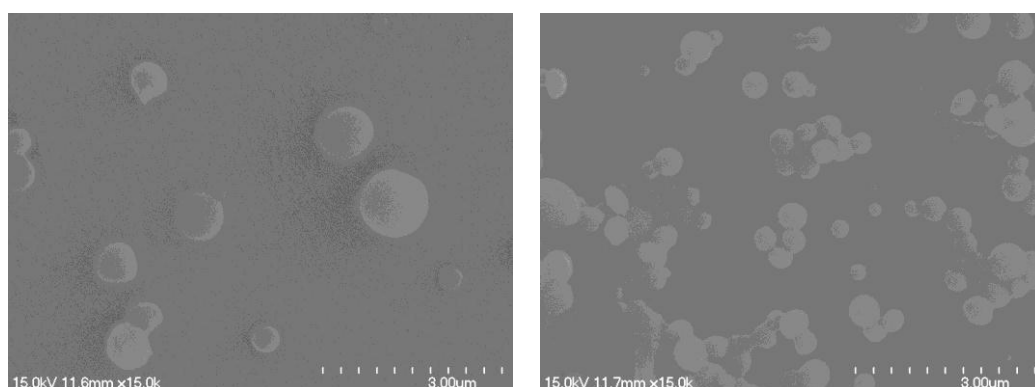

**Fig. S19** SEM images of PSd formed in THF/water (4:6 (left) and 1:9 (right) by volume). Scale bar is 3 μm.

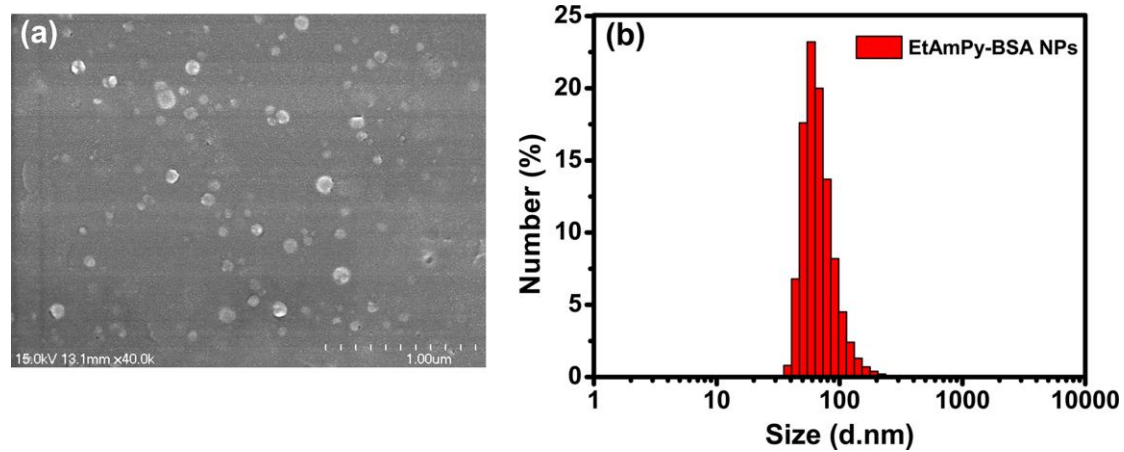

**Fig. S20** (a) SEM image of EtAmPy-BSA NPs and (b) size distribution of the particles measured by DLS analysis. Scale bar is 1 μm.

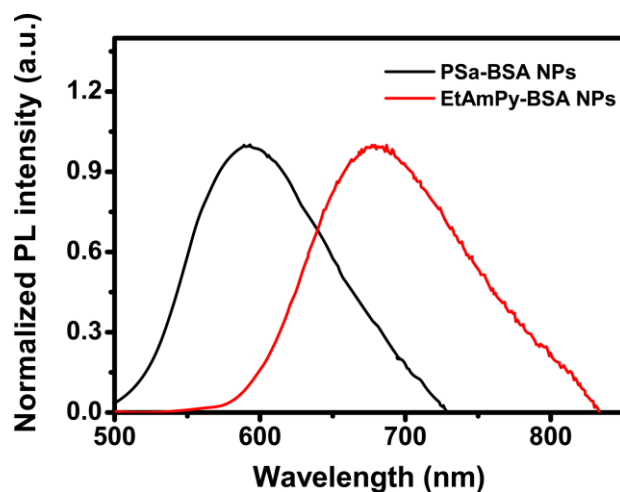

**Fig. S21** Emission spectra of EtAmPy-BSA NPs and PSa-BSA NPs in physiological saline suspension. Excitation wavelength: 479 nm.

**TABLE S2** Emission Characteristics of EtAmPy-BSA NPs and PSa-BSA NPs in physiological saline suspension<sup>a</sup>

| Sample         | $\lambda_{em}^b$ (nm) | $\Phi_F^c$ (%) |
|----------------|-----------------------|----------------|
| EtAmPy-BSA NPs | 680                   | 1.18           |
| PSa-BSA NPs    | 594                   | 13.34          |

<sup>a</sup> Excitation wavelength: 479nm. <sup>b</sup> Emission maximum. <sup>c</sup> Fluorescent quantum yield estimated using fluorescein ( $\Phi_F = 79\%$  in  $0.1 \text{ mol L}^{-1} \text{ NaOH}$ ) as standard.

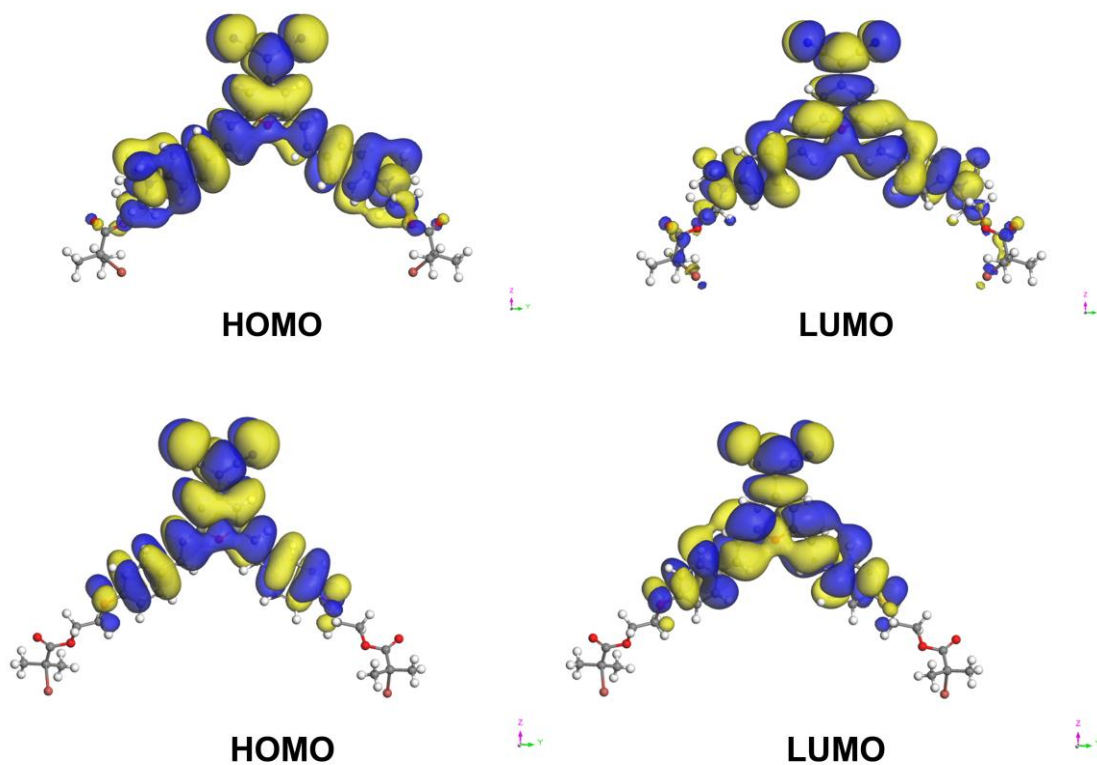

**Fig. S22** Molecular orbital amplitude plots of HOMO and LUMO energy levels of EtAmPy (top) and EtOxPy (bottom).
